# Supplementary material
Source: publisher site journal article supplement (https://www.dovepress.com/article/170497)
Supplement: Supplementary file 1 [file get_supplementary_file.php]

## Supplementary search strategy for major databases (February, 2018)

### Pubmed

1. "Baths"[Mesh]
2. (shower\* or bath\* or wash\* or cleans\*) [Title]
3. 1 or 2
4. "Chlorhexidine"[Mesh]
5. (chlorhexidine or chlorohex\* or eludril\* or corsodyl\* or Periochip\* or CHX or nolvasan\* or sebidin\* or tubulicid\* or Cervitec\* or Chlorzoin\* or hibitane\*)[Title]
6. 4 or 5
7. "Methicillin-Resistant Staphylococcus aureus"[Mesh]
8. (methicillin-resistan\* or meticillin-resistan\* or MRSA or EMRSA or MDRO)[Title]
9. 7 or 8
10. "Enterococcus"[Mesh]
11. "Vancomycin Resistance"[Mesh]
12. 10 and 11
13. (vancomycin resistant enterococc\* or VRE) [Title]
14. 12 or 13
15. 9 or 14
16. 3 and 6 and 15

**Embase**

1. "bath"/exp
2. (shower\* or bath\* or wash\* or cleans\*):ti
3. 1 OR 2
4. 'chlorhexidine'/exp
5. (chlorhexidine or chlorohex\* or eludril\* or corsodyl\* or Periochip\* or hibitane or nolvasan\* or sebidin\* or tubulicid\* or Cervitec\* or Chlorzoin\* or\* CHX):ti
6. 4 OR 5
7. 'methicillin resistant staphylococcus aureus'/exp
8. (methicillin-resistan\* or meticillin-resistan\* or MRSA or EMRSA or MDRO):ti
9. 7 OR 8
10. 'enterococcus'/exp
11. 'antibiotic resistance'/exp
12. 10 AND 11
13. (vancomycin resistant enterococc\* or VRE):ti
14. 12 OR 13
15. 9 OR 14
16. 3 AND 6 AND 15

## The Cochrane Library

- #1 MeSH descriptor: [Baths] explode all trees
- #2 shower\* or bath\* or wash\* or cleans\*:ti (Word variations have been searched)
- #3 #1 or #2
- #4 MeSH descriptor: [Chlorhexidine] explode all trees
- #5 chlorhexidine or chlorohex\* or eludril\* or corsodyl\* or Periochip\* or CHX or nolvasan\* or sebidin\* or tubulicid\* or Cervitec\* or Chlorzoin\* or hibitane\*:ti (Word variations have been searched)
- #6 #4 or #5
- #7 MeSH descriptor: [Methicillin-Resistant Staphylococcus aureus] explode all trees
- #8 methicillin-resistan\* or meticillin-resistan\* or MRSA or EMRSA or MDRO:ti (Word variations have been searched)
- #9 #7 or #8
- #10 MeSH descriptor: [Enterococcus] explode all trees
- #11 MeSH descriptor: [Vancomycin Resistance] explode all trees
- #12 #11 and #10
- #13 vancomycin resistant enterococc\* or VRE:ti (Word variations have been searched)
- #14 #12 or #13
- #15 #9 or #14
- #16 #3 and #6 and #15

**Supplementary quality assessment.** Methodological quality of included articles based on the Newcastle–Ottawa Scale for non-randomized control trials and the Cochrane risk of bias tool for randomized controlled trials.

|           |      | Selection                                |                                     |                           |                                                                          | Comparability                                                   | Outcome               |                                                 |                                  |                     |
|-----------|------|------------------------------------------|-------------------------------------|---------------------------|--------------------------------------------------------------------------|-----------------------------------------------------------------|-----------------------|-------------------------------------------------|----------------------------------|---------------------|
| Study     |      | Representativeness of the exposed cohort | Selection of the non exposed cohort | Ascertainment of exposure | Demonstration that outcome of interest was not present at start of study | Comparability of cohorts on the basis of the design or analysis | Assessment of outcome | Was follow-up long enough for outcomes to occur | Adequacy of follow up of cohorts | Total quality score |
| Lowe      | 2017 |                                          | ★                                   | ★                         | ★                                                                        | ★★                                                              | ★                     | ★                                               | ★                                | 8                   |
| Kim       | 2016 |                                          | ★                                   | ★                         | ★                                                                        | ★★                                                              | ★                     | ★                                               | ★                                | 8                   |
| Colling   | 2015 |                                          | ★                                   | ★                         | ★                                                                        | ★★                                                              | ★                     | ★                                               |                                  | 7                   |
| Bass      | 2013 |                                          | ★                                   | ★                         | ★                                                                        | ★★                                                              | ★                     | ★                                               |                                  | 7                   |
| Kassakian | 2011 | ★                                        | ★                                   | ★                         | ★                                                                        | ★★                                                              |                       | ★                                               | ★                                | 9                   |
| Evans     | 2010 |                                          | ★                                   | ★                         | ★                                                                        | ★★                                                              | ★                     | ★                                               | ★                                | 8                   |
| Fraser    | 2010 | ★                                        | ★                                   | ★                         | ★                                                                        | ★★                                                              |                       | ★                                               | ★                                | 8                   |
| Popovich  | 2010 | ★                                        | ★                                   | ★                         | ★                                                                        | ★★                                                              | ★                     | ★                                               |                                  | 8                   |
| Climo     | 2009 |                                          | ★                                   | ★                         | ★                                                                        | ★★                                                              | ★                     | ★                                               |                                  | 7                   |
| Popovich  | 2009 |                                          | ★                                   | ★                         | ★                                                                        | ★★                                                              | ★                     | ★                                               |                                  | 7                   |
| Ridenour  | 2007 | ★                                        | ★                                   | ★                         | ★                                                                        | ★★                                                              | ★                     | ★                                               |                                  | 8                   |

**Newcastle-Ottawa Scale for assessing the quality of studies in meta-analysis** <sup>□</sup>

Note: A study can be awarded a maximum of one star for each numbered item within the Selection and Outcome categories. A maximum of two stars can be given for Comparability.

Supplementary materials

| Study      | Year | Random sequence generation | Allocation concealment | Blinding of participants and researchers | Blinding of outcome assessment | Incomplete outcome data | Selective reporting | Other bias |
|------------|------|----------------------------|------------------------|------------------------------------------|--------------------------------|-------------------------|---------------------|------------|
| Amirov     | 2017 | L                          | U                      | H                                        | U                              | L                       | H                   | L          |
| Millar     | 2015 | L                          | L                      | H                                        | H                              | L                       | H                   | L          |
| Climo      | 2013 | L                          | U                      | H                                        | U                              | L                       | L                   | L          |
| Huang      | 2013 | L                          | L                      | H                                        | U                              | L                       | L                   | H          |
| Montecalvo | 2012 | L                          | U                      | H                                        | U                              | L                       | H                   | H          |
| Vernon     | 2006 | L                          | L                      | H                                        | H                              | L                       | L                   | H          |

Note: Cochrane Collaboration's tool for assessing risk of bias for randomized trials, which assesses the risk of bias (L=low, H=high, U=unclear) across 7 domains: random sequence generation, allocation concealment, blinding of participants and researchers, blinding of outcome assessment, incomplete outcome data, selective reporting and other bias.
